# Supplementary material for: Probing substrate effects on relaxation dynamics of ultrathin poly(vinyl acetate) films by dynamic wetting of water droplets on their surfaces
Source: Royal Society of Chemistry journal article supplement (doi:10.1039/c3sm52150h), 2013-01-01
Supplement: c3sm52150h.pdf [file c3sm52150h.pdf]

Supplementary Information for:

Probing Substrate Effects on Relaxation Dynamics of  
Ultrathin Poly(vinyl acetate) Films by Dynamic Wetting  
of Water Droplets on Their Surfaces

*FanFan Zheng, Biao Zuo, Yumei Zhu, JuPing Yang, Xinping Wang\**

Department of Chemistry, Key Laboratory of Advanced Textile Materials and  
Manufacturing Technology of Education Ministry, Zhejiang Sci-Tech University,  
Hangzhou 310018, P. R. China

## Section 1: Surface topographies of PVAc films on substrates with various hydroxyl contents

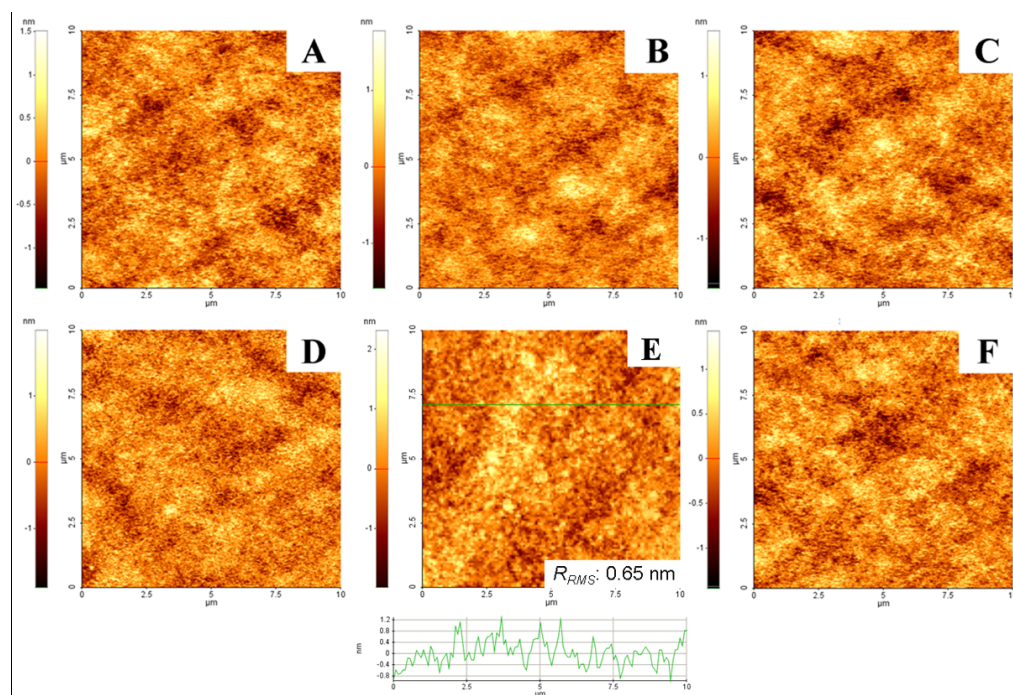

**Figure S1.** AFM morphology images of PVAc thin films ( $6\pm 2\text{nm}$ ) spin coated on substrates with different hydroxyl content: (a) 29% (b) 43.6% (c) 65.4% (d) 76.5% (e) 85.7% (f) 100%

Figure S1 illustrates the AFM topographies images for the 6 nm PVAc films deposited on substrates with various surface hydroxyl content. It is seen from Figure S1 that all these surfaces of PVAc ultra-thin films are smooth with RMS roughness less than 5 nm, being insufficient to affect the water spreading on the surface<sup>1,2</sup>.

## Section 2: Advancing contact angle behavior of water droplets on the surface of thin PVAc films with various thickness

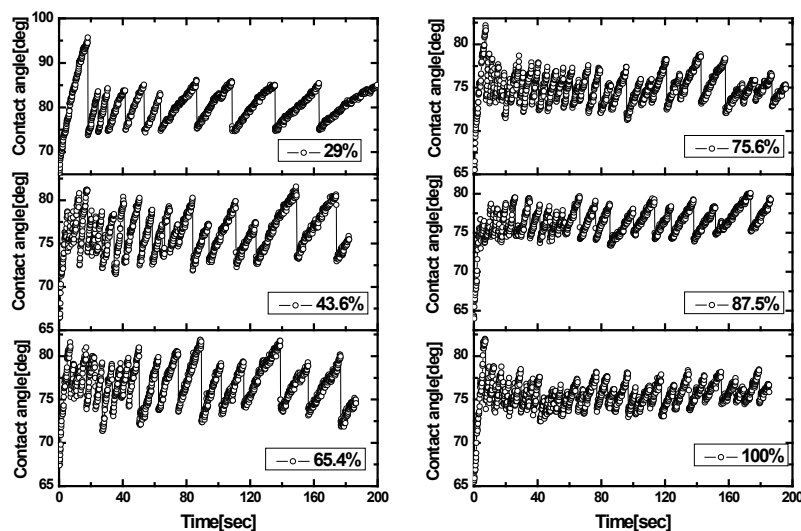

**Figure S2.** Advancing contact angles of water on the surface of thin PVAc films ( $20\pm 3\text{nm}$ )

supported on substrates with different hydroxyl content as a function of time.

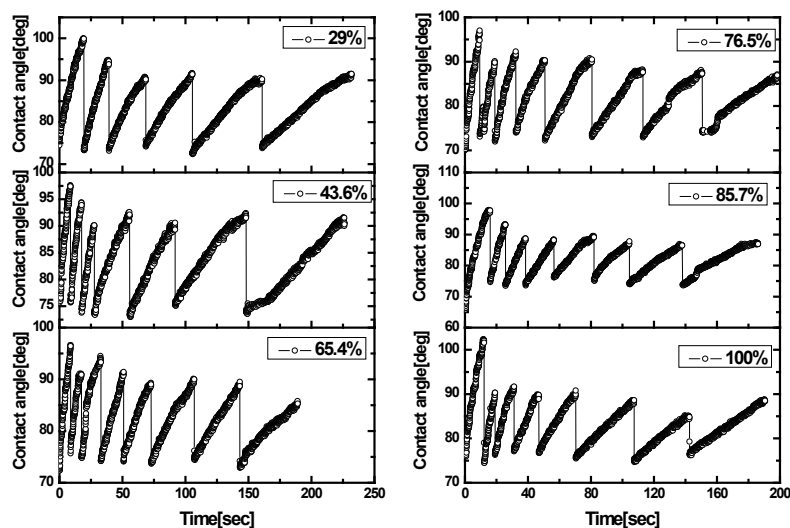

**Figure S3.** Advancing contact angles of water on the surface of thin PVAc films ( $35\pm 2\text{nm}$ )

supported on substrates with different hydroxyl content as a function of time.

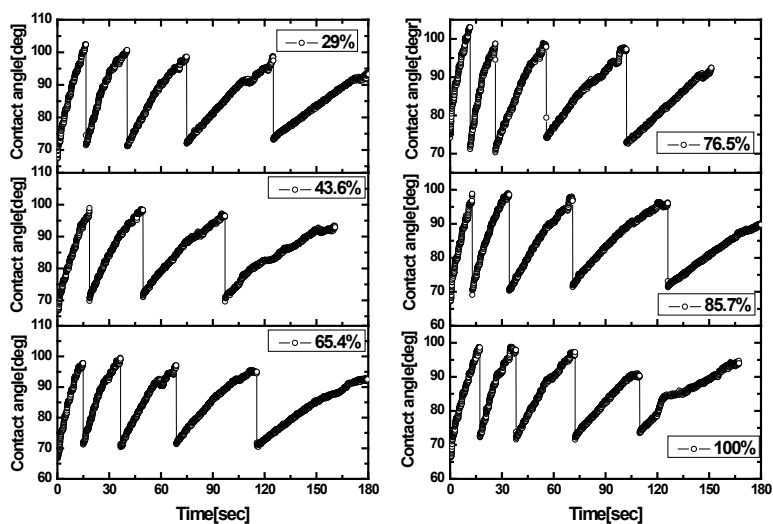

**Figure S4.** Advancing contact angles of water on the surface of PVAc thin films ( $47\pm 3\text{nm}$ )

supported on substrates with different hydroxyl content as a function of time.

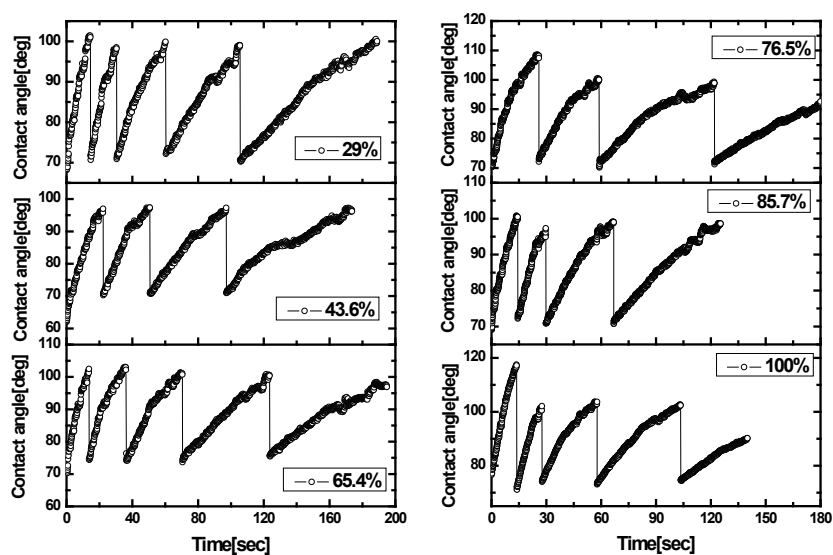

**Figure S5.** Advancing contact angles of water on the surface of thin PVAc films ( $76\pm 3\text{nm}$ )

supported on substrates with different hydroxyl content as a function of time.

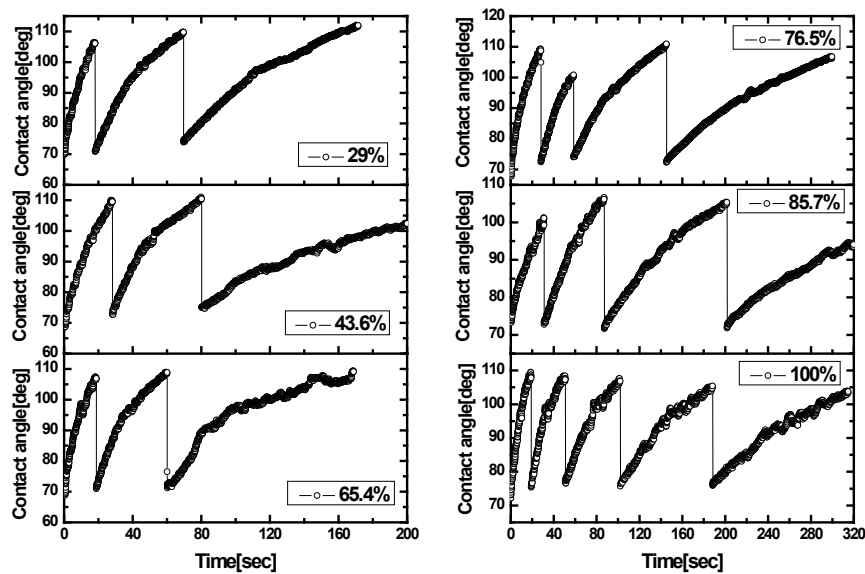

**Figure S6.** Advancing contact angles of water on the surface of thin PVAc films ( $118\pm 3\text{nm}$ ) supported on substrates with different hydroxyl content as a function of time.

### Section 3: Correlations between the jumping angle and the substrate surface hydroxyl content for PVAc films of various thickness

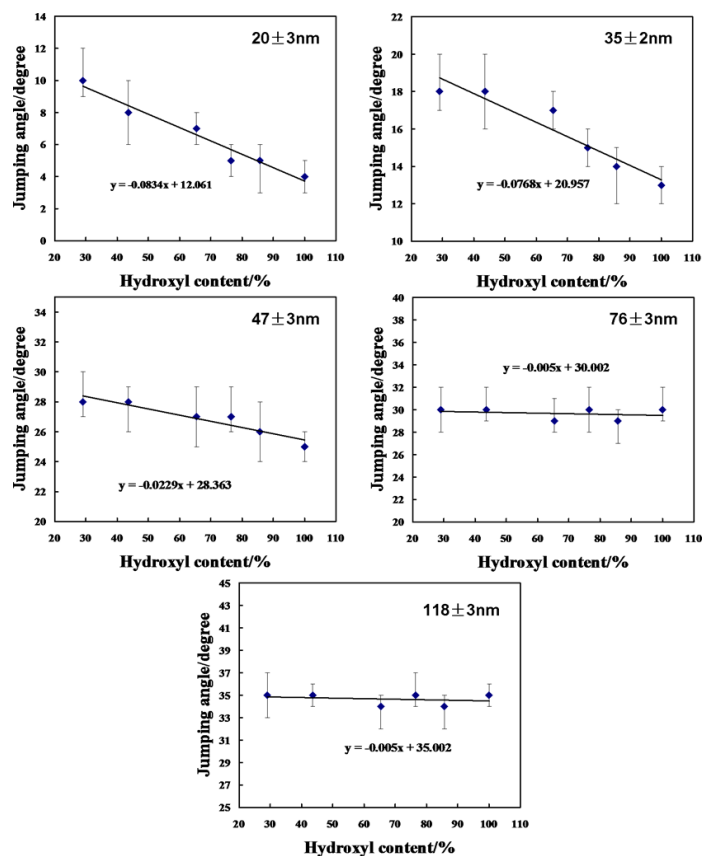

**Figure S7.** Jumping angle plotted as a function of hydroxyl content on the substrate with different film thickness

## Section 4: Plots of film thickness normalized by the value at 25°C as a function of temperature for PVAc films

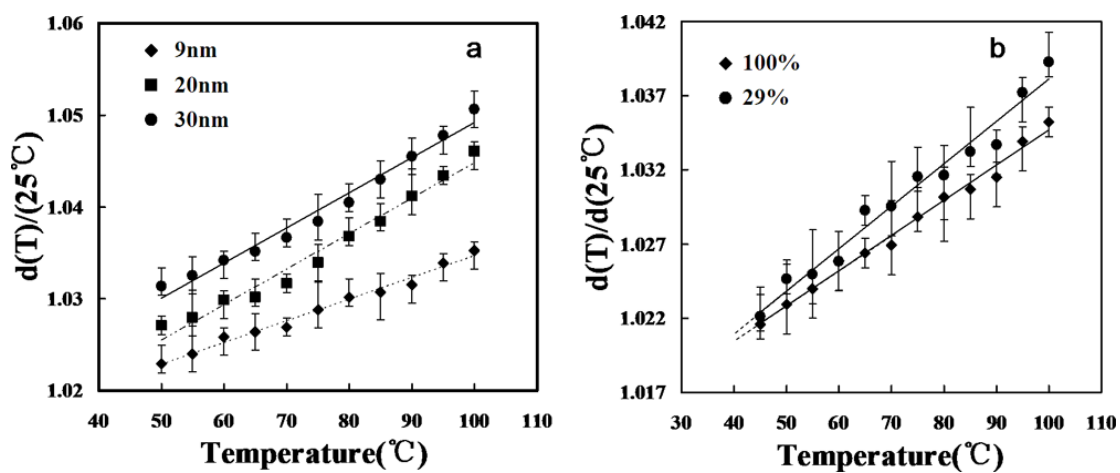

**Figure S8.** Plots of film thickness normalized by the value at 25°C as a function of temperature for PVAc films: (a) Films with different thickness supported on the substrate completely covered by hydroxyl groups. (b) PVAc films supported on the substrate surfaces with 29% and 100% hydroxyl groups (9 ± 2nm).

## Section 5: Force-Distance curves of ultrathin PVAc films supported on substrates with different hydroxyl content

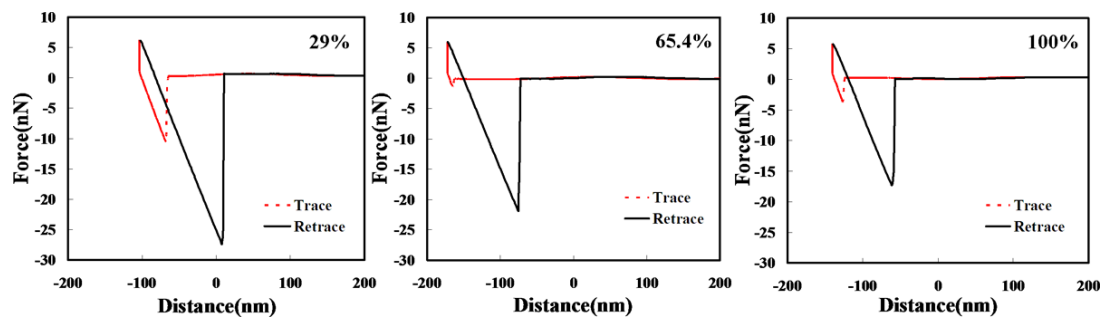

**Figure S9.** Force-Distance curves of PVAc films ( $6\pm 2$ nm) supported on substrates with different hydroxyl content.

### References:

- (1) H. J. Busscher, A. W. J. van Pelt, P. de Boer, H. P. de Jong and J. Arends, *Colloids and Surfaces*, 1984, **9**, 319-331.
- (2) H. Tavana, D. Jehnichen, K. Grundke, M. L. Hair and A.W. Neumann, *Advances in Colloid and Interface Science*, 2007, **134-135**, 236-248.
